# Supplementary material
Source: Royal Society of Chemistry journal article supplement (doi:10.1039/d6cp00564k)
Supplement: d6cp00564k1.pdf [file d6cp00564k1.pdf]

## Supplementary information

### **A Theoretical Calculation Guided Strategy for Designing Energetic Composite Materials with Enhanced Thermal Conductivity by Adjusting Interfacial Interactions**

Jialu Guan<sup>a</sup>, Junqing Lv<sup>a</sup>, Wei Chen<sup>a</sup>, Mai Zhang<sup>a</sup>, Yanze Liu<sup>a</sup>, Guanchen Dong<sup>a</sup>, Bowei Gao<sup>a</sup>, Weihua Zhu<sup>a</sup>,  
Guangcheng Yang<sup>d</sup>, Qiong Wu<sup>c,\*</sup>, Linghua Tan<sup>b,\*</sup>

*<sup>a</sup>School of Chemistry and Chemical Engineering, Nanjing University of Science and Technology, Nanjing 210094, China*

*<sup>b</sup>School of Safety Science and Engineering, Nanjing University of Science and Technology, Nanjing 210094, China*

*<sup>c</sup>School of Materials Science and Engineering, Jiangsu Key Laboratory of Advanced Structural Materials and Application Technology, Nanjing Institute of Technology, Nanjing 211167, China*

*<sup>d</sup>Institute of Chemical Materials, China Academy of Engineering Physics, Mianyang 621022, Sichuan, China.*

#Jialu Guan and Junqing Lv contributed equally to this paper;

\*Corresponding author: Linghua Tan, and Qiong Wu;

Email address: tanlh@njust.edu.cn (Linghua Tan), and qwunjit@163.com (Qiong Wu)

## 1. Sample LAMMPS Input Decks for the Force Field of the h-BNNS/HMX System

In this simulation system, the correspondence between atom types and atom IDs is defined as follows:

Types 1 through 5 correspond to atoms in the HMX molecule. Specifically, Type 1 represents hydrogen atom; Type 2 represents the nitrogen atom on the nitro group; Type 3 represents the nitrogen atom on the eight-membered ring; Type 4 represents oxygen atom; and Type 5 represents carbon atom.

Types 6 and 7 correspond to atoms on the h-BNNS, where Type 6 represents nitrogen atom and Type 7 represents boron atom.

Types 8 through 11 correspond to atoms on the h-BNNS-OH, where Type 8 represents hydrogen atom, Type 9 represents boron atom, Type 10 represents nitrogen atom and Type 11 represents oxygen atom.

This assignment ensures a clear distinction between the HMX and BNNS components when assigning force field parameters.

```
bond_style      harmonic
angle_style     harmonic
dihedral_style  hybrid harmonic multi/harmonic
improper_style  harmonic
pair_style       hybrid/overlay buck/coul/long 11.0 lj/cut 11.0 tersoff

bond_coeff      1 560.0000 1.2300
bond_coeff      2 495.8500 1.3600
bond_coeff      3 336.0500 1.4400
bond_coeff      4 340.0500 1.0900
bond_coeff      5 727.2177 1.467
bond_coeff      6 508.6717 0.993

angle_coeff     1 62.5000 120.9170
angle_coeff     2 62.5000 107.4525
angle_coeff     3 65.0000 95.8157
angle_coeff     4 35.0000 105.5961
angle_coeff     5 43.2000 107.0056
angle_coeff     6 38.5000 108.5067
angle_coeff     7 35.0000 110.5178

dihedral_coeff  1 multi/harmonic 8.450 0.000 -5.290 0.000 -3.160
dihedral_coeff  2 harmonic -0.080 -1 3
dihedral_coeff  3 multi/harmonic 0.095 -1.485 1.610 -0.220 0.000

improper_coeff  1 4.0000 0.0000
improper_coeff  2 44.6500 0.0000

pair_coeff      ** tersoff BNC.tersoff NULL NULL NULL NULL NULL N B
pair_coeff      1 1 buck/coul/long 2649.70 0.26737968 27.34544584
pair_coeff      1 1 lj/cut 0.0000125 3.20855615
pair_coeff      1 2 buck/coul/long 12695.88 0.26595745 116.9071639
pair_coeff      1 2 lj/cut 0.0000125 3.191489362
```

|            |     |                |           |             |             |
|------------|-----|----------------|-----------|-------------|-------------|
| pair_coeff | 1 3 | buck/coul/long | 12695.88  | 0.26595745  | 116.9071639 |
| pair_coeff | 1 3 | lj/cut         | 0.0000125 | 3.191489362 |             |
| pair_coeff | 1 4 | buck/coul/long | 14175.97  | 0.25634453  | 104.4176355 |
| pair_coeff | 1 4 | lj/cut         | 0.0000125 | 3.076134325 |             |
| pair_coeff | 1 5 | buck/coul/long | 4320.00   | 0.29282577  | 138.1058732 |
| pair_coeff | 1 5 | lj/cut         | 0.0000125 | 3.513909224 |             |
| pair_coeff | 2 2 | buck/coul/long | 60833.90  | 0.26455026  | 499.9488192 |
| pair_coeff | 2 2 | lj/cut         | 0.0000125 | 3.174603175 |             |
| pair_coeff | 2 3 | buck/coul/long | 60833.90  | 0.26455026  | 499.9488192 |
| pair_coeff | 2 3 | lj/cut         | 0.0000125 | 3.174603175 |             |
| pair_coeff | 2 4 | buck/coul/long | 67925.95  | 0.25503698  | 446.5589156 |
| pair_coeff | 2 4 | lj/cut         | 0.0000125 | 3.060443764 |             |
| pair_coeff | 2 5 | buck/coul/long | 30183.57  | 0.29112082  | 565.939114  |
| pair_coeff | 2 5 | lj/cut         | 0.0000125 | 3.493449782 |             |
| pair_coeff | 3 3 | buck/coul/long | 60833.90  | 0.26455026  | 499.9488192 |
| pair_coeff | 3 3 | lj/cut         | 0.0000125 | 3.174603175 |             |
| pair_coeff | 3 4 | buck/coul/long | 67925.95  | 0.25503698  | 446.5589156 |
| pair_coeff | 3 4 | lj/cut         | 0.0000125 | 3.060443764 |             |
| pair_coeff | 3 5 | buck/coul/long | 30183.57  | 0.29112082  | 565.939114  |
| pair_coeff | 3 5 | lj/cut         | 0.0000125 | 3.493449782 |             |
| pair_coeff | 4 4 | buck/coul/long | 75844.80  | 0.24612355  | 398.8668123 |
| pair_coeff | 4 4 | lj/cut         | 0.0000125 | 2.953482648 |             |
| pair_coeff | 4 5 | buck/coul/long | 33702.40  | 0.27964206  | 505.5286042 |
| pair_coeff | 4 5 | lj/cut         | 0.0000125 | 3.355704698 |             |
| pair_coeff | 5 5 | buck/coul/long | 14976.00  | 0.32362460  | 640.6284832 |
| pair_coeff | 5 5 | lj/cut         | 0.0000125 | 3.883495146 |             |

special\_bonds lj/coul 0.0 0.0 1.0 dihedral yes

|            |     |        |             |             |  |
|------------|-----|--------|-------------|-------------|--|
| pair_coeff | 7 5 | lj/cut | 0.137477271 | 3.965303645 |  |
| pair_coeff | 7 1 | lj/cut | 0.088994382 | 3.432715834 |  |
| pair_coeff | 7 4 | lj/cut | 0.18734994  | 3.780277768 |  |
| pair_coeff | 7 2 | lj/cut | 0.181493802 | 3.885209261 |  |
| pair_coeff | 7 3 | lj/cut | 0.181493802 | 3.885209261 |  |

|            |     |        |             |             |  |
|------------|-----|--------|-------------|-------------|--|
| pair_coeff | 6 5 | lj/cut | 0.138618181 | 3.773214412 |  |
| pair_coeff | 6 1 | lj/cut | 0.089732937 | 3.266426488 |  |
| pair_coeff | 6 4 | lj/cut | 0.188904738 | 3.597151651 |  |
| pair_coeff | 6 2 | lj/cut | 0.183       | 3.697       |  |
| pair_coeff | 6 3 | lj/cut | 0.183       | 3.697       |  |

|            |       |        |             |             |  |
|------------|-------|--------|-------------|-------------|--|
| pair_coeff | 11 11 | lj/cut | 0.195       | 3.5         |  |
| pair_coeff | 8 8   | lj/cut | 0.044       | 2.886       |  |
| pair_coeff | 11 8  | lj/cut | 0.092628289 | 3.178207042 |  |

|            |    |    |        |             |             |
|------------|----|----|--------|-------------|-------------|
| pair_coeff | 11 | 9  | lj/cut | 0.18734994  | 3.780277768 |
| pair_coeff | 8  | 9  | lj/cut | 0.088994382 | 3.432715834 |
| pair_coeff | 11 | 10 | lj/cut | 0.188904738 | 3.597151651 |
| pair_coeff | 8  | 10 | lj/cut | 0.089732937 | 3.266426488 |
|            |    |    |        |             |             |
| pair_coeff | 11 | 5  | lj/cut | 0.14309088  | 3.671307669 |
| pair_coeff | 11 | 1  | lj/cut | 0.092628289 | 3.178207042 |
| pair_coeff | 11 | 4  | lj/cut | 0.195       | 3.5         |
| pair_coeff | 11 | 2  | lj/cut | 0.188904738 | 3.597151651 |
| pair_coeff | 11 | 3  | lj/cut | 0.188904738 | 3.597151651 |
| pair_coeff | 8  | 5  | lj/cut | 0.067970582 | 3.333764539 |
| pair_coeff | 8  | 1  | lj/cut | 0.044       | 2.886       |
| pair_coeff | 8  | 4  | lj/cut | 0.092628289 | 3.178207042 |
| pair_coeff | 8  | 2  | lj/cut | 0.089732937 | 3.266426488 |
| pair_coeff | 8  | 3  | lj/cut | 0.089732937 | 3.266426488 |
|            |    |    |        |             |             |
| pair_coeff | 9  | 5  | lj/cut | 0.137477271 | 3.965303645 |
| pair_coeff | 9  | 1  | lj/cut | 0.088994382 | 3.432715834 |
| pair_coeff | 9  | 4  | lj/cut | 0.18734994  | 3.780277768 |
| pair_coeff | 9  | 2  | lj/cut | 0.181493802 | 3.885209261 |
| pair_coeff | 9  | 3  | lj/cut | 0.181493802 | 3.885209261 |
| pair_coeff | 10 | 5  | lj/cut | 0.138618181 | 3.773214412 |
| pair_coeff | 10 | 1  | lj/cut | 0.089732937 | 3.266426488 |
| pair_coeff | 10 | 4  | lj/cut | 0.188904738 | 3.597151651 |
| pair_coeff | 10 | 2  | lj/cut | 0.183       | 3.697       |
| pair_coeff | 10 | 3  | lj/cut | 0.183       | 3.697       |

Table S1 Thermal conductivity of HMX with different heat transfer lengths

| Heat transfer lengths(nm) | Thermal conductivity(W/m·K) |
|---------------------------|-----------------------------|
| 5                         | 0.210                       |
| 10                        | 0.552                       |
| 20                        | 0.739                       |

Table S2 Comparison of lattice parameters of  $\beta$ -HMX from the SB force field, other computational methods, and experiments.

| work                        | <i>a</i> | <i>b</i> | <i>c</i> |
|-----------------------------|----------|----------|----------|
| SB FF $\beta$ -HMX          | 6.59536  | 10.41324 | 7.70733  |
| Experimental <sup>[1]</sup> | 6.54     | 11.05    | 8.7      |
| <i>%dev</i>                 | 0.84     | -5.76    | -11.41   |
| GGA-PBE+TS <sup>[2]</sup>   | 6.63     | 11.22    | 8.82     |
| <i>%dev</i>                 | -0.52    | -7.19    | -12.62   |
| CASTEP <sup>[1]</sup>       | 6.61     | 10.98    | 8.75     |
| <i>%dev</i>                 | -0.22    | -5.16    | -11.92   |

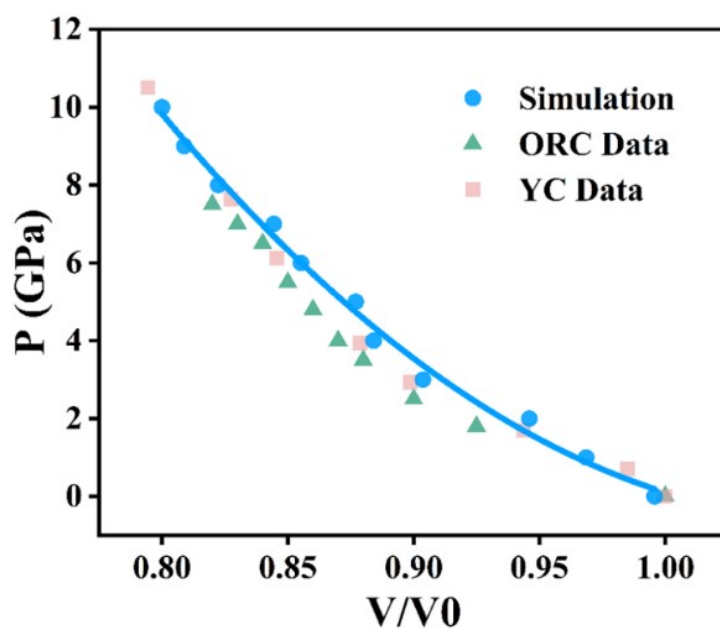

**Figure S1.** Pressure-volume (P-V) curve of the  $\beta$ -HMX lattice calculated using the Smith-Bharadwaj force field.<sup>[1]</sup>

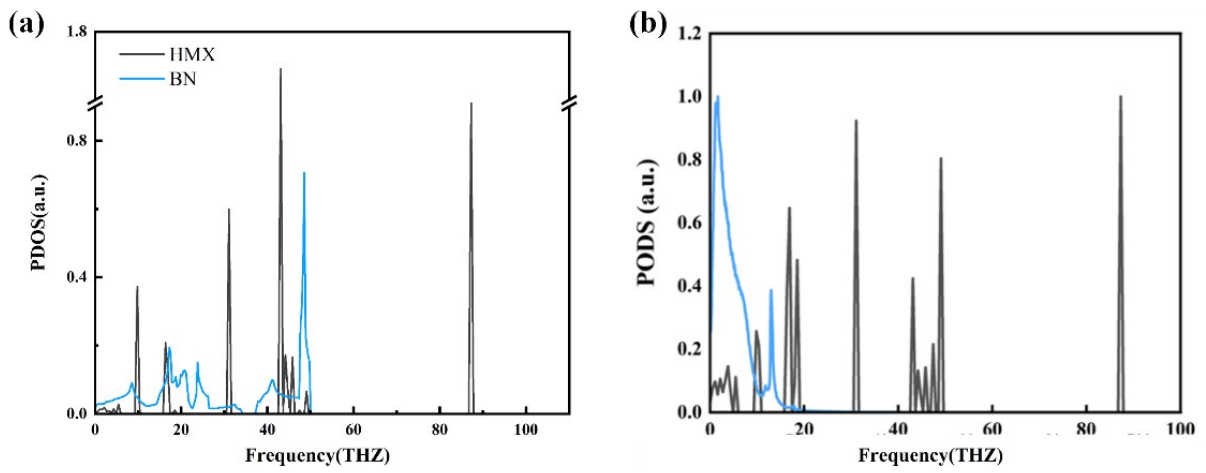

**Figure S2** Phonon density of states of (a) h-BNNS/HMX and (b) h-BNNS-OH/HMX

**Reference:**

1. C.-S. Yoo and H. Cynn, *The Journal of Chemical Physics*, 1999, **111**, 10229-10235.
2. H. Qin, W. Zeng, F.-S. Liu, Y.-D. Gan, B. Tang, S.-H. Zhu and Q.-J. Liu, *Journal of Energetic Materials*, 2021, **39**, 125-169.
